# Supplementary material
Source: PubMed Central journal article supplement (PMC6936301)
Supplement: ject-51-201SupplementalData.pdf [file ject-51-201SupplementalData.pdf]

## Readmission at 30 to 365 days CIF plots – Cardiac Biomarkers

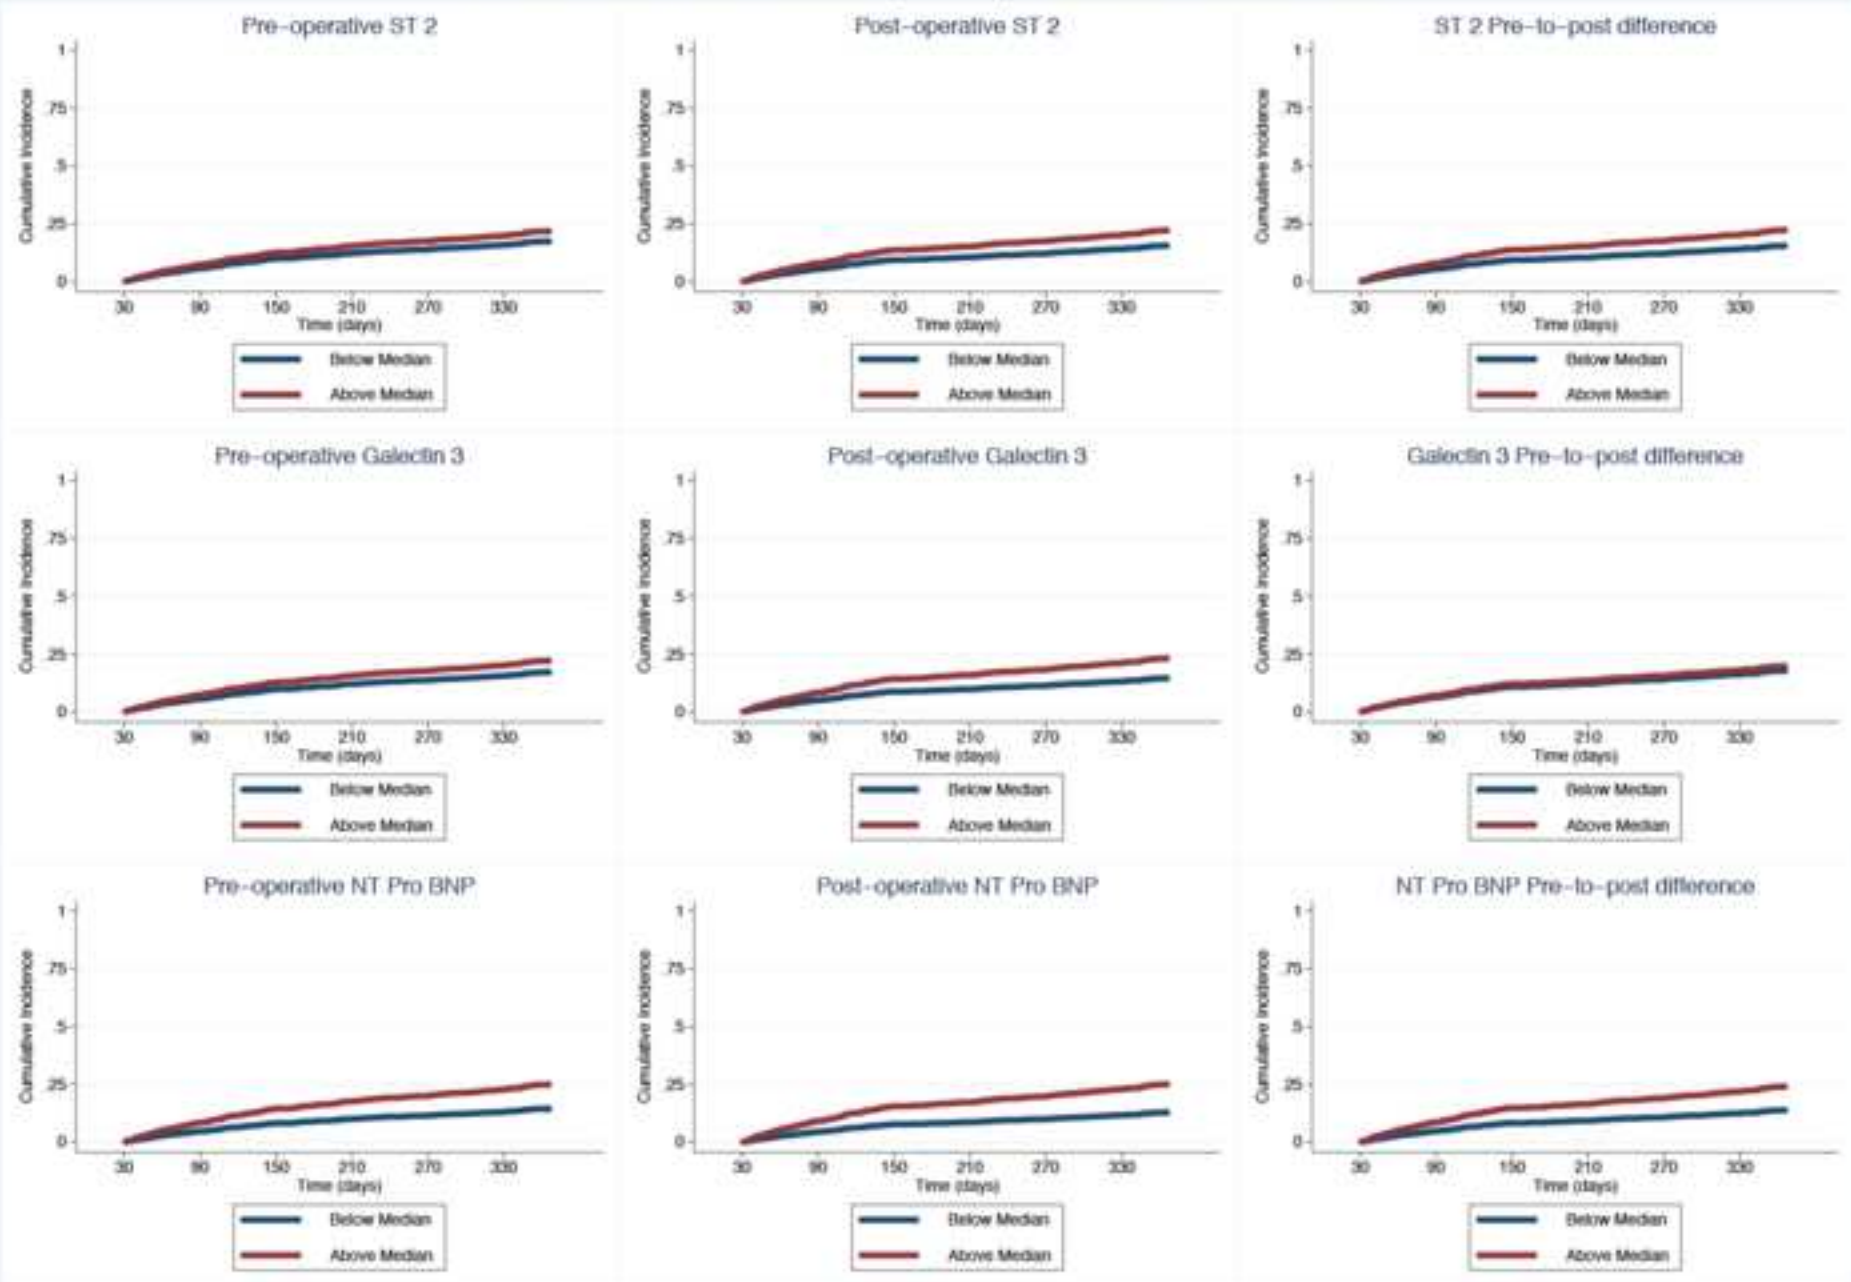

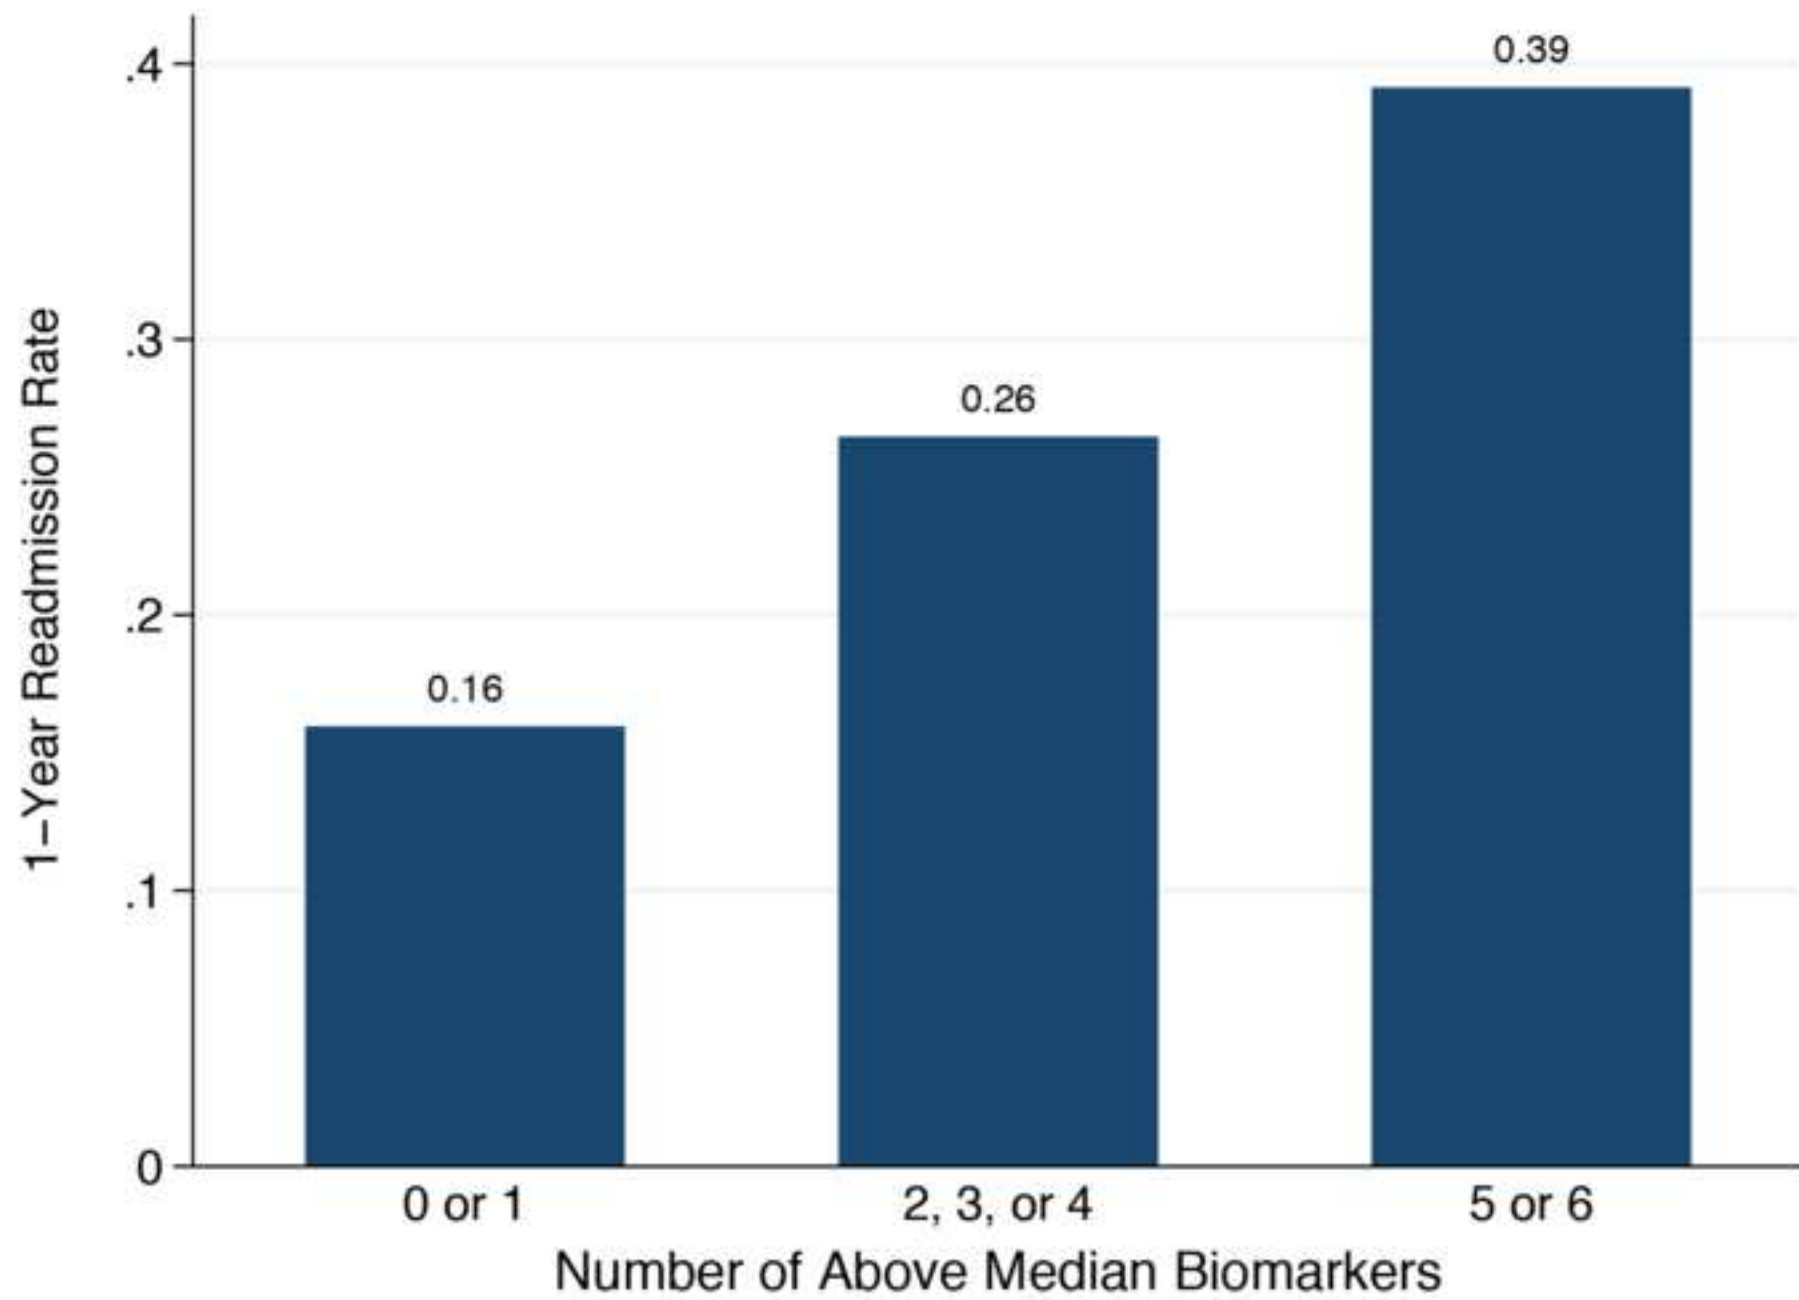

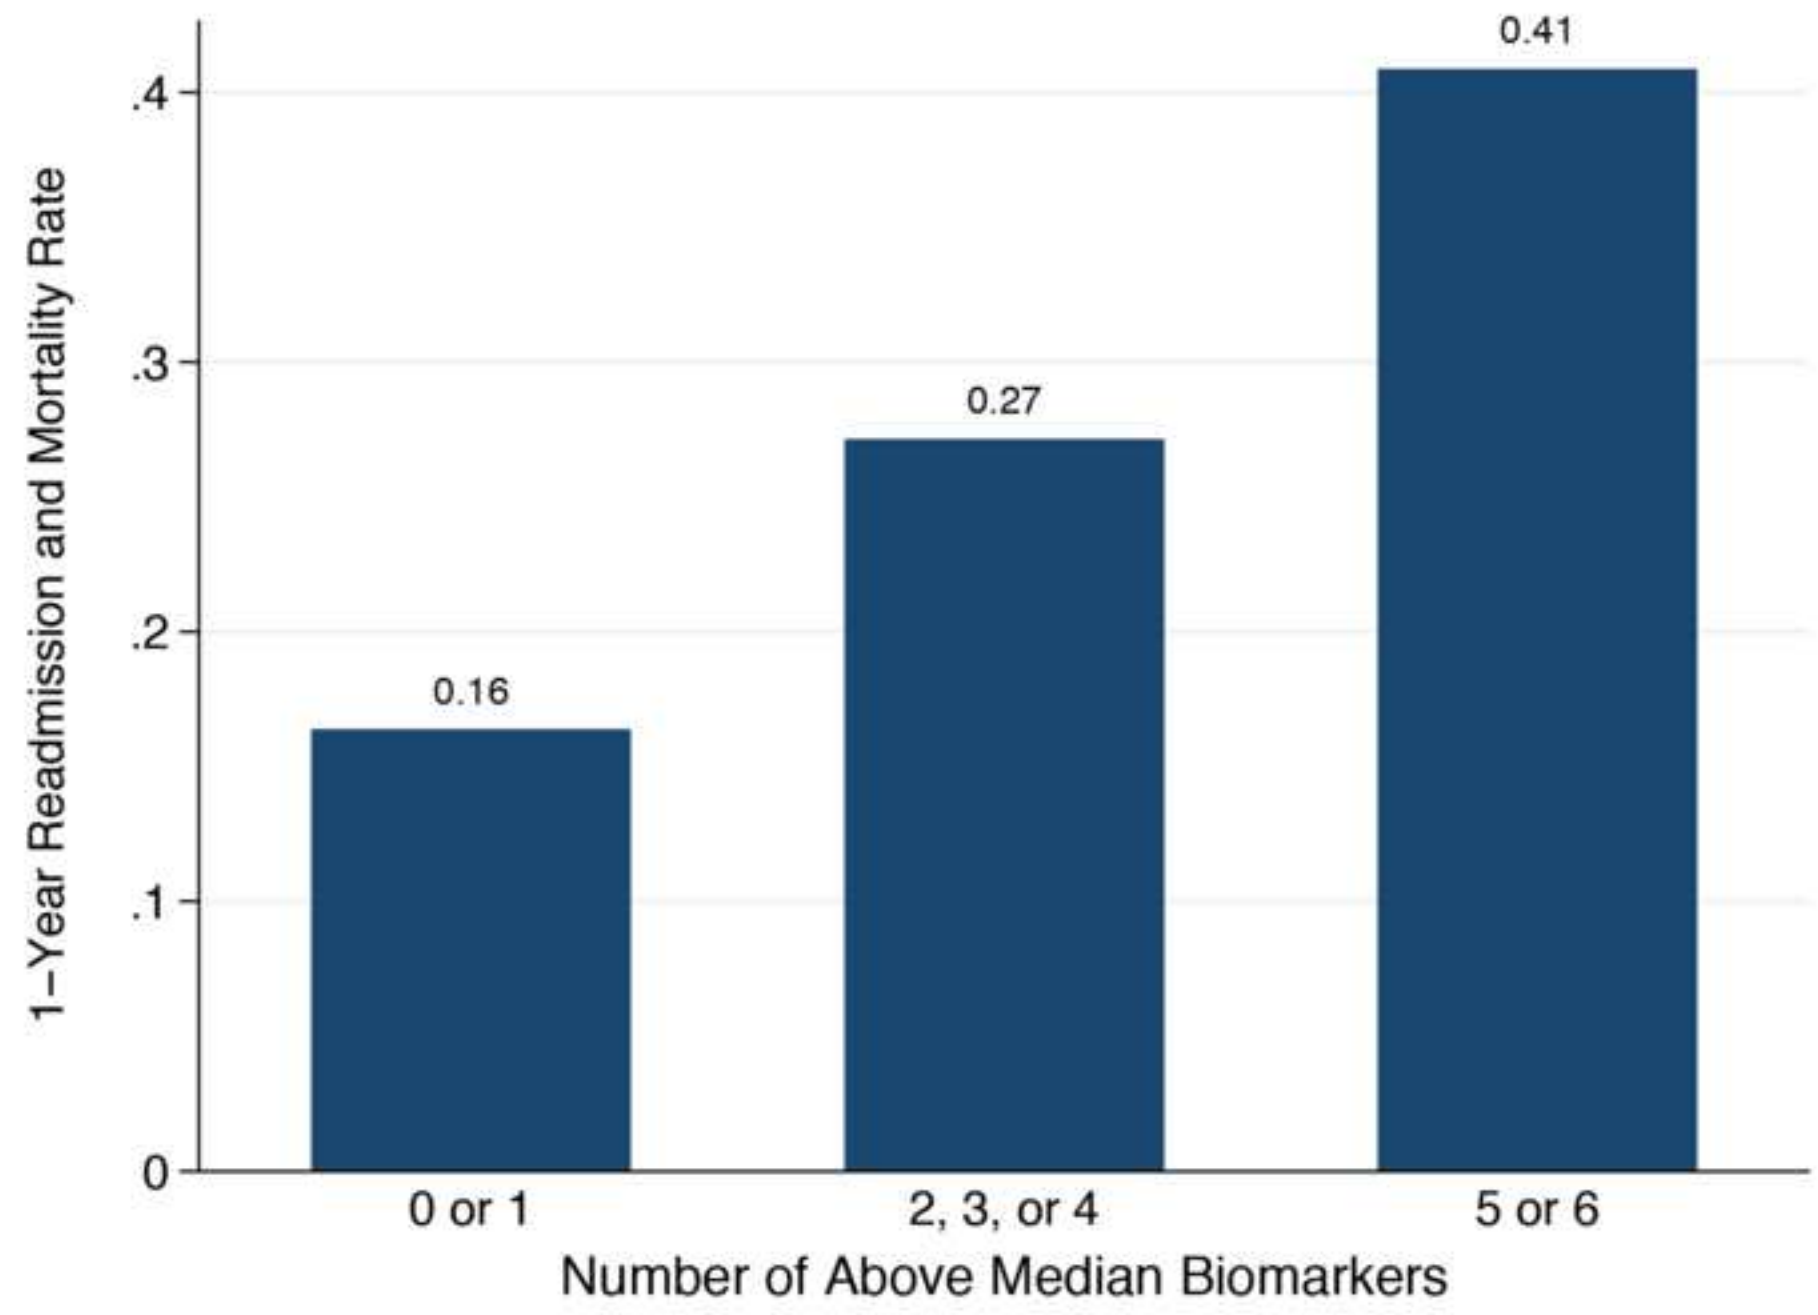

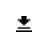

# 1-Year Readmission

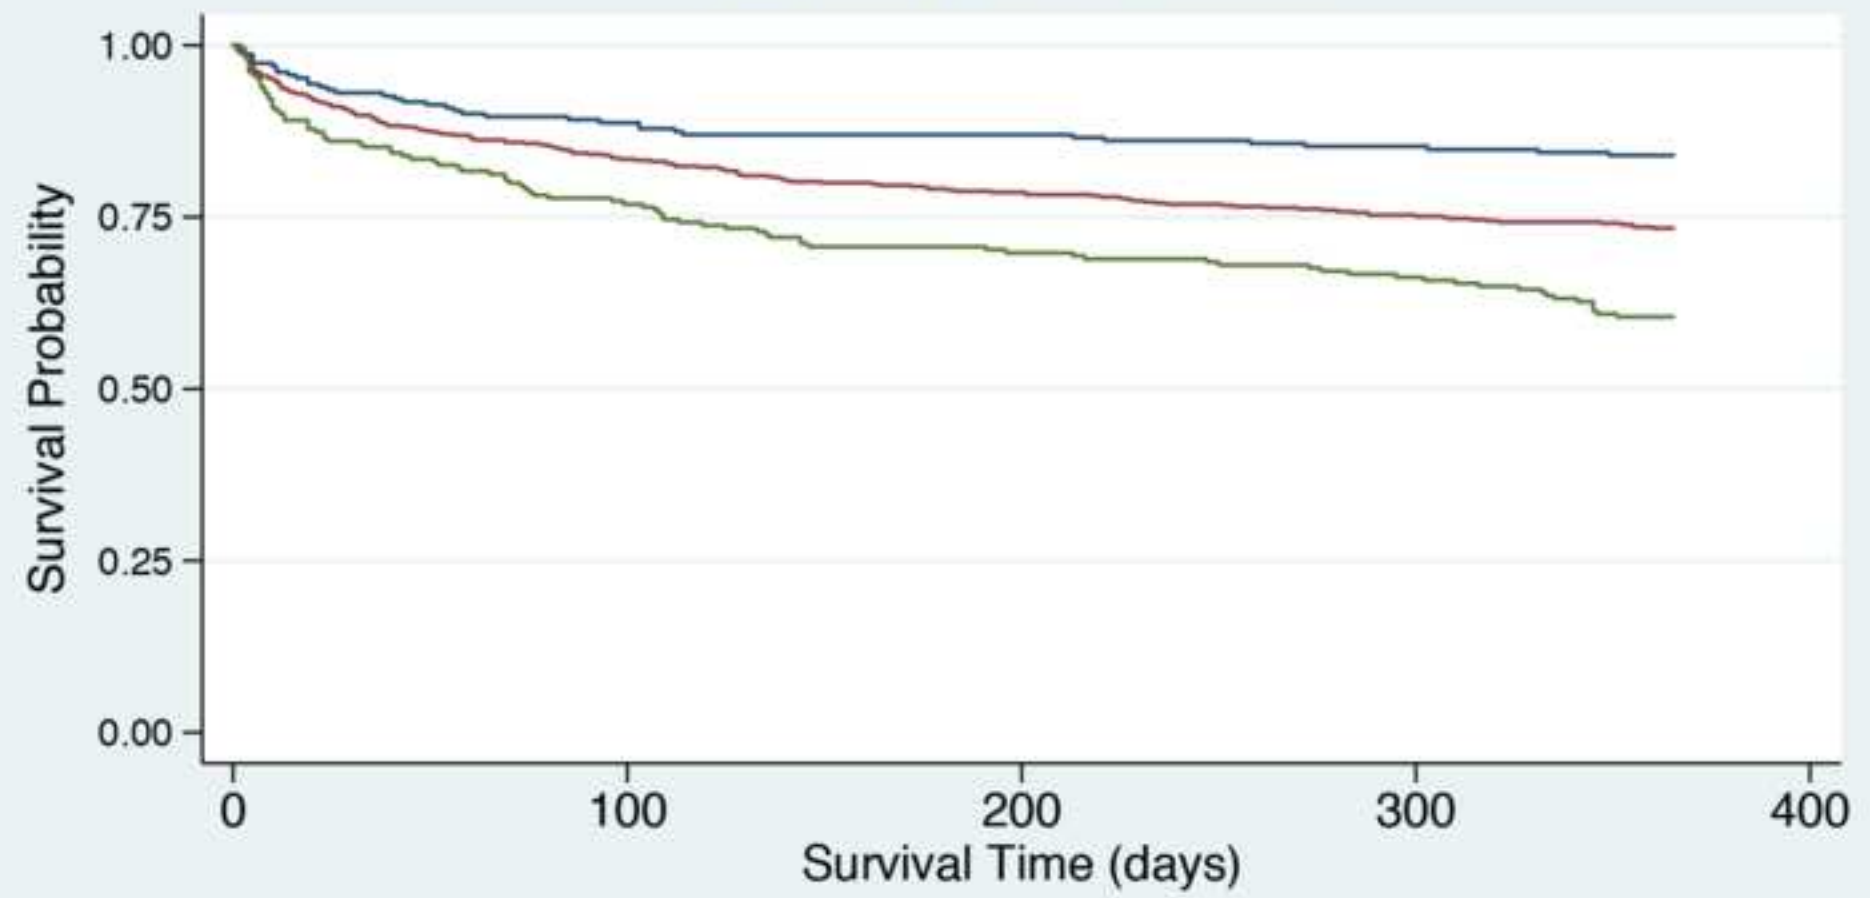

Number of Above Median Biomarkers

- 0 or 1
- 2, 3, or 4
- 5 or 6

## 1-Year Readmission or Mortality

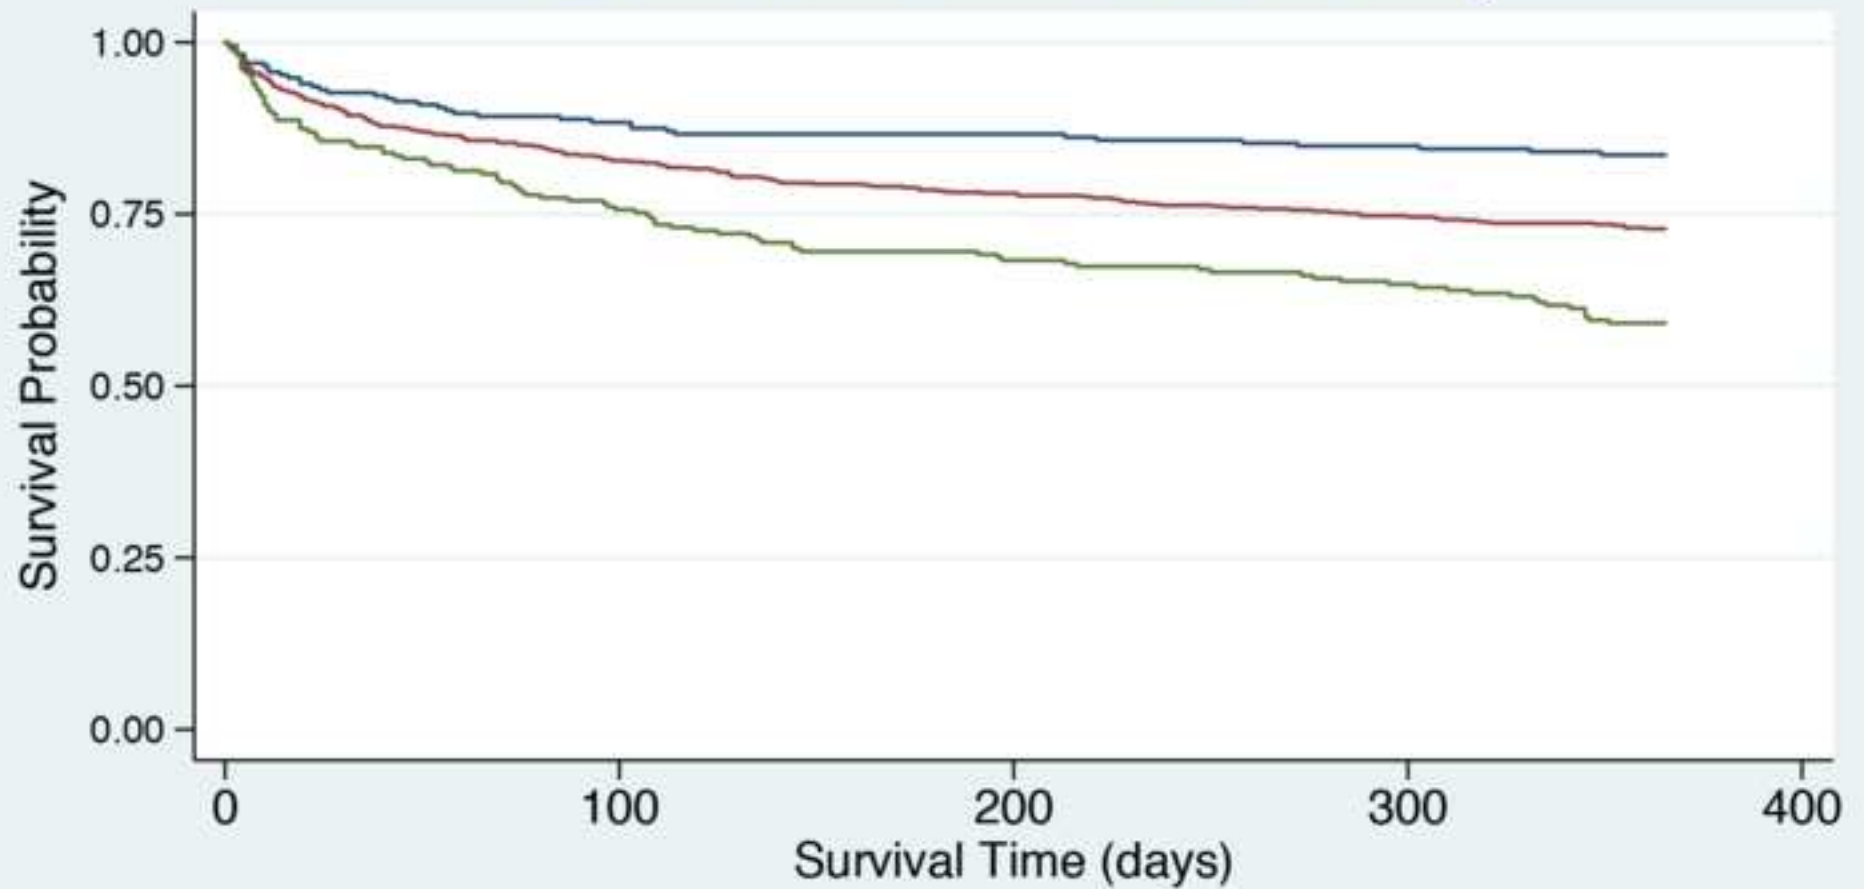

Number of Above Median Biomarkers

— 0 or 1

— 2, 3, or 4

— 5 or 6

**Table S1.** List of pre-operative factors in STS 30-day Readmission Model and ASCERT mortality model

1. Ejection fraction (EF)
2. Pre-operative atrial fibrillation
3. Prior myocardial infarction (MI)
4. Age
5. Unstable angina
6. Congestive heart failure (CHF)
7. Renal function
8. Status
9. Gender
10. Whether or not the surgery is a re-operation
11. Chronic lung disease
12. Diabetes
13. Pre-operative intra-aortic balloon pump (IABP) or inotropes
14. Immunosuppressive treatment
15. Peripheral vascular disease (PVD)
16. Body surface area (BSA)
17. Cerebro-vascular disease (CVD)
18. Hypertension
19. Percutaneous coronary intervention (PCI) less than or equal to six hours prior to surgery
20. Left main disease
21. Surgery date

Additional ASCERT factors

22. Height
23. Body mass index (BMI)
24. Creatinine
25. Mean aortic insufficiency
26. History of cerebrovascular disease
27. Number of prior cardiovascular operations
28. Number of diseased vessels
29. Moderate/severe tricuspid, aortic, or mitral insufficiency

**Table S2. Pre-operative and Post-operative Biomarker Summary Statistics**

|                              | <b>Minimum</b> | <b>Maximum</b> | <b>25<sup>th</sup><br/>percentile</b> | <b>Median</b> | <b>75<sup>th</sup><br/>percentile</b> | <b>Tertile 1<br/>Minimum</b> | <b>Tertile 1<br/>Maximum</b> | <b>Tertile 2<br/>Minimum</b> | <b>Tertile 2<br/>Maximum</b> | <b>Tertile 3<br/>Minimum</b> | <b>Tertile 3<br/>Maximum</b> | <b>N</b> |
|------------------------------|----------------|----------------|---------------------------------------|---------------|---------------------------------------|------------------------------|------------------------------|------------------------------|------------------------------|------------------------------|------------------------------|----------|
| Pre-operative IL 10 (pg/mL)  | 0.05           | 27.90          | 0.24                                  | 0.33          | 0.50                                  | 0.05                         | 0.27                         | 0.27                         | 0.43                         | 0.43                         | 27.90                        | 1393     |
| Post-operative IL 10 (pg/mL) | 0.10           | 140.00         | 0.59                                  | 0.92          | 1.58                                  | 0.10                         | 0.66                         | 0.66                         | 1.25                         | 1.26                         | 140.00                       | 1047     |
| Pre-operative IL 6 (pg/mL)   | 0.19           | 179.00         | 0.89                                  | 1.50          | 2.93                                  | 0.19                         | 1.06                         | 1.07                         | 2.25                         | 2.26                         | 179.00                       | 1393     |
| Post-operative IL 6 (pg/mL)  | 0.33           | 1548.00        | 16.80                                 | 28.40         | 47.90                                 | 0.33                         | 20.10                        | 20.30                        | 37.50                        | 37.60                        | 1548.00                      | 1047     |

**Table S3. Cox Regression Model Results for Postoperative Cytokine Biomarker Levels and Readmission or Mortality\***

| Biomarker |                 | Readmission within 365 days |                              |                              | Death within 365 days  |                              |                              |
|-----------|-----------------|-----------------------------|------------------------------|------------------------------|------------------------|------------------------------|------------------------------|
|           |                 | HR (95% CI) unadjusted      | HR (95% CI) adjusted Model 1 | HR (95% CI) adjusted Model 2 | HR (95% CI) unadjusted | HR (95% CI) adjusted Model 1 | HR (95% CI) adjusted Model 2 |
| IL-6      | Log-transformed | 1.26 (1.08-1.48)            | 1.24 (1.04-1.48)             | 1.22 (1.02-1.46)             | 1.70 (1.25-2.32)       | 1.62 (1.08-2.43)             | 1.76 (1.12-2.77)             |
|           | Below Median    | <b>1.00 (referent)</b>      | <b>1.00 (referent)</b>       | <b>1.00 (referent)</b>       | <b>1.00 (referent)</b> | <b>1.00 (referent)</b>       | <b>1.00 (referent)</b>       |
|           | Above Median    | 1.31 (1.03-1.66)            | 1.22 (0.95-1.56)             | 1.15 (0.89-1.48)             | 2.33 (0.97-5.63)       | 1.88 (0.71-4.95)             | 1.91 (0.71-5.15)             |
|           | Tertile 1       | <b>1.00 (referent)</b>      | <b>1.00 (referent)</b>       | <b>1.00 (referent)</b>       | <b>1.00 (referent)</b> | <b>1.00 (referent)</b>       | <b>1.00 (referent)</b>       |
|           | Tertile 2       | 0.84 (0.61-1.14)            | 0.79 (0.57-1.09)             | 0.78 (0.56-1.08)             | 2.30 (0.59-8.88)       | 2.63 (0.57-12.20)            | 2.66 (0.51-13.71)            |
|           | Tertile 3       | 1.45 (1.10-1.91)            | 1.36 (1.01-1.82)             | 1.29 (0.95-1.74)             | 4.58 (1.32-15.93)      | 4.88 (1.23-19.30)            | 5.93 (1.29-27.31)            |
| IL-10     | Log-transformed | 1.27 (1.10-1.46)            | 1.18 (1.01-1.38)             | 1.23 (1.05-1.44)             | 1.47 (0.96-2.27)       | 1.09 (0.58-2.03)             | 1.05 (0.58-1.91)             |
|           | Below Median    | <b>1.00 (referent)</b>      | <b>1.00 (referent)</b>       | <b>1.00 (referent)</b>       | <b>1.00 (referent)</b> | <b>1.00 (referent)</b>       | <b>1.00 (referent)</b>       |
|           | Above Median    | 1.31 (1.04-1.66)            | 1.20 (0.93-1.53)             | 1.25 (0.97-1.61)             | 1.37 (0.61-3.09)       | 0.81 (0.34-1.97)             | 0.78 (0.31-1.91)             |
|           | Tertile 1       | <b>1.00 (referent)</b>      | <b>1.00 (referent)</b>       | <b>1.00 (referent)</b>       | <b>1.00 (referent)</b> | <b>1.00 (referent)</b>       | <b>1.00 (referent)</b>       |
|           | Tertile 2       | 1.26 (0.93-1.70)            | 1.09 (0.80-1.49)             | 1.13 (0.80-1.55)             | 1.12 (0.41-3.09)       | 0.56 (0.17-1.79)             | 0.61 (0.19 – 1.95)           |
|           | Tertile 3       | 1.52 (1.14-2.04)            | 1.32 (0.97-1.80)             | 1.40 (1.03-1.91)             | 1.25 (0.47-3.36)       | 0.53 (0.15-1.87)             | 0.57 (0.16 – 2.05)           |



**Table S4. Variables dropped from combined STS 30-day readmission and STS ASCERT long-term mortality models**

| <b>Variable list from STS ASCERT study (Shahian et al 2012)</b> | <b>NNE Dataset</b>                                                                                                      |
|-----------------------------------------------------------------|-------------------------------------------------------------------------------------------------------------------------|
| Aortic insufficiency - moderate to severe                       | Aortic regurgitation seemed to be the closest available variable to aortic insufficiency                                |
| Past smoker                                                     | STS long-term model breaks this into never/past/current; NNE data only has a binary variable for current smoking status |
| Hispanic                                                        | Not in NNE dataset                                                                                                      |
| Asian                                                           | Not in NNE dataset                                                                                                      |
| Black                                                           | Not in NNE dataset                                                                                                      |
| Immunosuppressive treatment                                     | Not in NNE dataset                                                                                                      |
| Prior carotid surgery                                           | Not in NNE dataset                                                                                                      |
| Re-operation - 2+ previous operations                           | Not in NNE dataset                                                                                                      |
| Shock                                                           | Only two non-missing observations for this in the NNE dataset                                                           |

**Table S5.** Additional Characteristics by Levels of Preoperative IL-6

|                                                   | <b>Below median</b>          | <b>Above median</b>          | <b>P-value</b> | <b>Tertile 1</b>             | <b>Tertile 2</b>             | <b>Tertile 3</b>             | <b>P-value</b> |
|---------------------------------------------------|------------------------------|------------------------------|----------------|------------------------------|------------------------------|------------------------------|----------------|
|                                                   | <b>Percentage or Mean±SD</b> | <b>Percentage or Mean±SD</b> |                | <b>Percentage or Mean±SD</b> | <b>Percentage or Mean±SD</b> | <b>Percentage or Mean±SD</b> |                |
| Length of stay from admission to discharge (days) | 7.94±6.66                    | 10.44±6.92                   | <0.001         | 7.90±7.68                    | 8.57±4.08                    | 11.08±7.84                   | <0.001         |
| Post-operative stroke                             | *                            | *                            | 0.023          | *                            | *                            | *                            | 0.011          |
| Post-operative transient ischemic attack          | *                            | *                            | 0.622          | *                            | *                            | *                            | 0.828          |
| Return to OR for bleeding                         | *                            | *                            | 0.415          | *                            | *                            | *                            | 0.656          |
| Mediastinitis/Sternal dehiscence requiring re-op  |                              |                              | 0.286          |                              |                              |                              | 0.390          |
| No                                                | *                            | *                            |                | *                            | *                            | *                            |                |
| Yes, in-hospital                                  | *                            | *                            |                | *                            | *                            | *                            |                |
| Yes, after discharge                              | *                            | *                            |                | *                            | *                            | *                            |                |
| Post-op leg wound infection                       | *                            | *                            | 0.363          | *                            | *                            | *                            | 0.911          |
| Post-op pneumonia                                 | *                            | *                            | 0.117          | *                            | *                            | 2.63%                        | 0.133          |
| Post-op atrial fibrillation                       | 20.59%                       | 21.73%                       | 0.603          | 20.72%                       | 22.83%                       | 19.91%                       | 0.536          |
| Low cardiac output intra- or post-operatively     | 3.31%                        | 6.42%                        | 0.008          | 2.81%                        | 3.75%                        | 8.02%                        | <0.001         |
| Congestive heart failure                          | 5.22%                        | 14.10%                       | <0.001         | 4.65%                        | 7.39%                        | 16.85%                       | <0.001         |

OR=operating room; \* = Indicates a suppressed or counter-suppressed value due to CMS policy.

**Table S6.** Additional Characteristics by Postoperative IL-6

|                                                  | <b>Below median</b>   | <b>Above median</b>   | P-value | <b>Tertile 1</b>      | <b>Tertile 2</b>      | <b>Tertile 3</b>      | P-value |
|--------------------------------------------------|-----------------------|-----------------------|---------|-----------------------|-----------------------|-----------------------|---------|
|                                                  | Percentage or Mean±SD | Percentage or Mean±SD |         | Percentage or Mean±SD | Percentage or Mean±SD | Percentage or Mean±SD |         |
| Length of stay from admission to discharge       | 8.48±6.64             | 10.01±7.72            | <0.001  | 8.41±7.20             | 8.89±5.31             | 10.46±8.69            | <0.001  |
| Post-operative stroke                            | *                     | *                     | 0.509   | *                     | *                     | *                     | 0.751   |
| Post-operative transient ischemic attack         | *                     | *                     | 0.963   | *                     | *                     | *                     | 0.358   |
| Return to OR for bleeding                        | *                     | *                     | 0.039   | *                     | *                     | *                     | 0.178   |
| Mediastinitis/Sternal dehiscence requiring re-op |                       |                       |         |                       |                       |                       |         |
| No                                               | *                     | *                     | 0.463   | *                     | *                     | *                     | 0.205   |
| Yes, in-hospital                                 | *                     | *                     |         | *                     | *                     | *                     |         |
| Yes, after discharge                             | *                     | *                     |         | *                     | *                     | *                     |         |
| Post-op leg wound infection                      | *                     | *                     | 0.067   | *                     | *                     | *                     | 0.049   |
| Post-op pneumonia                                | *                     | *                     | 0.360   | *                     | *                     | *                     | 0.174   |
| Post-op atrial fibrillation                      | 20.00%                | 24.34%                | 0.091   | 17.84%                | 24.36%                | 24.36%                | 0.059   |
| Low cardiac output intra- or post-operatively    | 5.18%                 | 5.16%                 | 0.990   | 4.76%                 | 5.87%                 | 4.89%                 | 0.776   |
| Congestive heart failure                         | 9.61%                 | 10.67%                | 0.569   | 10.82%                | 10.03%                | 9.63%                 | 0.871   |

OR=operating room; \* = Indicates a suppressed or counter-suppressed value due to CMS policy.

**Table S7.** Additional Characteristics by Preoperative IL-10

|                                                  | <b>Below median</b>   | <b>Above median</b>   | P-value | <b>Tertile 1</b>      | <b>Tertile 2</b>      | <b>Tertile 3</b>      | P-value |
|--------------------------------------------------|-----------------------|-----------------------|---------|-----------------------|-----------------------|-----------------------|---------|
|                                                  | Percentage or Mean±SD | Percentage or Mean±SD |         | Percentage or Mean±SD | Percentage or Mean±SD | Percentage or Mean±SD |         |
| Length of stay from admission to discharge       | 8.27±5.90             | 10.08±7.69            | <0.001  | 8.13±5.18             | 9.16±7.99             | 10.21±7.09            | <0.001  |
| Post-operative stroke                            | *                     | *                     | 0.775   | *                     | *                     | *                     | 0.225   |
| Post-operative transient ischemic attack         | *                     | *                     | 0.172   | *                     | *                     | *                     | 0.074   |
| Return to OR for bleeding                        | *                     | *                     | 0.840   | *                     | *                     | *                     | 0.077   |
| Mediastinitis/Sternal dehiscence requiring re-op |                       |                       |         |                       |                       |                       |         |
| No                                               | *                     | *                     | 0.273   | *                     | *                     | *                     | 0.287   |
| Yes, in-hospital                                 | *                     | *                     |         | *                     | *                     | *                     |         |
| Yes, after discharge                             | *                     | *                     |         | *                     | *                     | *                     |         |
| Post-op leg wound infection                      | *                     | *                     | 0.424   | *                     | *                     | *                     | 0.022   |
| Post-op pneumonia                                | *                     | *                     | 0.018   | *                     | 2.38%                 | *                     | 0.101   |
| Post-op atrial fibrillation                      | 20.80%                | 21.51%                | 0.745   | 20.09%                | 22.68%                | 20.69%                | 0.600   |
| Low cardiac output intra- or post-operatively    | 4.36%                 | 5.33%                 | 0.406   | 4.65%                 | 5.07%                 | 4.80%                 | 0.957   |
| Congestive heart failure                         | 6.13%                 | 13.08%                | <0.001  | 6.26%                 | 7.99%                 | 14.44%                | <0.001  |

OR=operating room; \* = Indicates a suppressed or counter-suppressed value due to CMS policy.

**Table S8.** Additional Characteristics by Postoperative IL-10

|                                                  | <b>Below median</b>   | <b>Above median</b>   | P-value | <b>Tertile 1</b>      | <b>Tertile 2</b>      | <b>Tertile 3</b>      | P-value |
|--------------------------------------------------|-----------------------|-----------------------|---------|-----------------------|-----------------------|-----------------------|---------|
|                                                  | Percentage or Mean±SD | Percentage or Mean±SD |         | Percentage or Mean±SD | Percentage or Mean±SD | Percentage or Mean±SD |         |
| Length of stay from admission to discharge       | 8.27±5.90             | 10.08±7.69            | <0.001  | 8.13±5.18             | 9.16±7.99             | 10.21±7.09            | <0.001  |
| Post-operative stroke                            | *                     | *                     | 0.775   | *                     | *                     | *                     | 0.225   |
| Post-operative transient ischemic attack         | *                     | *                     | 0.172   | *                     | *                     | *                     | 0.074   |
| Return to OR for bleeding                        | *                     | *                     | 0.840   | *                     | *                     | *                     | 0.077   |
| Mediastinitis/Sternal dehiscence requiring re-op |                       |                       |         |                       |                       |                       |         |
| No                                               | *                     | *                     | 0.273   | *                     | *                     | *                     | 0.287   |
| Yes, in-hospital                                 | *                     | *                     |         | *                     | *                     | *                     |         |
| Yes, after discharge                             | *                     | *                     |         | *                     | *                     | *                     |         |
| Post-op leg wound infection                      | *                     | *                     | 0.424   | *                     | *                     | *                     | 0.022   |
| Post-op pneumonia                                | *                     | *                     | 0.018   | *                     | 2.38%                 | *                     | 0.101   |
| Post-op atrial fibrillation                      | 20.80%                | 21.51%                | 0.745   | 20.09%                | 22.68%                | 20.69%                | 0.600   |
| Low cardiac output intra- or post-operatively    | 4.36%                 | 5.33%                 | 0.406   | 4.65%                 | 5.07%                 | 4.80%                 | 0.957   |
| Congestive heart failure                         | 6.13%                 | 13.08%                | <0.001  | 6.26%                 | 7.99%                 | 14.44%                | <0.001  |

OR=operating room; \* = Indicates a suppressed or counter-suppressed value due to CMS policy.
